# Supplementary material for: Lovastatin inhibits erythroleukemia progression through KLF2-mediated suppression of MAPK/ERK signaling
Source: Springer Nature journal article supplement (doi:10.1186/s12885-023-10742-4), 2023-04-04
Supplement: MOESM1 [file 25207586]

**Supplementary Table 1** | RNAsequencing data.

| st_gene_id  | gene_id   | gene_symbol        | EXP_DMSO | EXP_<br>Lovastatin | diffexp_log2fc_DMSO<br>-vs-Lovastatin |
|-------------|-----------|--------------------|----------|--------------------|---------------------------------------|
| G9606_28200 | 8362      | H4C12              | 2.32     | 0                  | -7.857981                             |
| G9606_29511 | 101928589 | LOC101928589       | 1.85     | 0                  | -7.5313815                            |
| G9606_11733 | 2953      | GSTT2              | 1.82     | 0                  | -7.5077946                            |
| G9606_24237 | 8681      | JMJD7-PLA2G4B      | 0.58     | 0                  | -5.857981                             |
| G9606_32443 | 100534592 | URGCP-MRPS24       | 0.49     | 0                  | -5.6147098                            |
| G9606_20016 | 8350      | H3C1               | 0.46     | 0                  | -5.523562                             |
| G9606_30971 | 440153    | OR11H12            | 0.4      | 0                  | -5.3219281                            |
| G9606_16435 | 161247    | FITM1              | 0.37     | 0                  | -5.2094534                            |
| G9606_23903 | 389125    | MUSTN1             | 0.37     | 0                  | -5.2094534                            |
| G9606_35077 | 135458    | HUS1B              | 0.36     | 0                  | -5.169925                             |
| G9606_8263  | 2543      | GAGE1              | 0.34     | 0                  | -5.0874628                            |
| G9606_12661 | 102723360 | LOC102723360       | 0.34     | 0                  | -5.0874628                            |
| G9606_17829 | 6346      | CCL1               | 0.33     | 0                  | -5.0443941                            |
| G9606_4005  | 102724334 | LOC102724334       | 0.33     | 0                  | -5.0443941                            |
| G9606_32654 | 645051    | GAGE13             | 0.29     | 0                  | -4.857981                             |
| G9606_68939 | 114118903 | ARHGAP11A-<br>SCG5 | 0.27     | 0                  | -4.7548875                            |
| G9606_23549 | 6462      | SHBG               | 0.27     | 0                  | -4.7548875                            |
| G9606_12503 | 140711    | TLDC2              | 0.27     | 0                  | -4.7548875                            |
| G9606_34219 | 93659     | CGB5               | 0.26     | 0                  | -4.7004397                            |
| G9606_20615 | 51327     | AHSP               | 0.25     | 0                  | -4.6438562                            |
| G9606_27920 | 56158     | TEX12              | 0.25     | 0                  | -4.6438562                            |
| G9606_26299 | 7123      | CLEC3B             | 0.24     | 0                  | -4.5849625                            |
| G9606_21109 | 283869    | NPW                | 0.22     | 0                  | -4.4594316                            |
| G9606_13328 | 102724652 | CRYAA2             | 0.21     | 0                  | -4.3923174                            |
| G9606_8904  | 3972      | LHB                | 0.21     | 0                  | -4.3923174                            |
| G9606_8340  | 203569    | PAGE2              | 0.2      | 0                  | -4.3219281                            |
| G9606_26978 | 51480     | VCX2               | 0.2      | 0                  | -4.3219281                            |
| G9606_12317 | 100526760 | ABHD14A-ACY1       | 0.19     | 0                  | -4.2479275                            |
| G9606_7227  | 2253      | FGF8               | 0.18     | 0                  | -4.169925                             |
| G9606_6061  | 114928    | GPRASP2            | 0.18     | 0                  | -4.169925                             |
| G9606_20101 | 6236      | RRAD               | 0.18     | 0                  | -4.169925                             |
| G9606_20922 | 29802     | VPREB3             | 0.18     | 0                  | -4.169925                             |
| G9606_10605 | 353500    | BMP8A              | 0.17     | 0                  | -4.0874628                            |
| G9606_3840  | 1159      | CKMT1B             | 0.17     | 0                  | -4.0874628                            |
| G9606_32570 | 2980      | GUCA2A             | 0.17     | 0                  | -4.0874628                            |
| G9606_35658 | 474382    | H2AB1              | 0.17     | 0                  | -4.0874628                            |
| G9606_24313 | 253582    | TMEM244            | 0.17     | 0                  | -4.0874628                            |
| G9606_33017 | 100170765 | ERICH4             | 0.16     | 0                  | -4                                    |

|             |           |              |      |      |            |
|-------------|-----------|--------------|------|------|------------|
| G9606_27496 | 7379      | UPK2         | 0.16 | 0    | -4         |
| G9606_7290  | 4935      | GPR143       | 0.15 | 0    | -3.9068906 |
| G9606_22896 | 728361    | OVOL3        | 0.15 | 0    | -3.9068906 |
| G9606_393   | 126969    | SLC44A3      | 0.15 | 0    | -3.9068906 |
| G9606_35610 | 729201    | SPACA5B      | 0.15 | 0    | -3.9068906 |
| G9606_17448 | 100653133 | LOC100653133 | 0.14 | 0    | -3.8073549 |
| G9606_10282 | 149499    | LRRC71       | 0.14 | 0    | -3.8073549 |
| G9606_9169  | 27334     | P2RY10       | 0.14 | 0    | -3.8073549 |
| G9606_12124 | 763       | CA5A         | 0.13 | 0    | -3.7004397 |
| G9606_26138 | 115811    | IQCD         | 0.13 | 0    | -3.7004397 |
| G9606_31000 | 6703      | SPRR2D       | 0.13 | 0    | -3.7004397 |
| G9606_14327 | 7125      | TNNC2        | 0.13 | 0    | -3.7004397 |
| G9606_3040  | 7253      | TSHR         | 0.13 | 0    | -3.7004397 |
| G9606_6120  | 11326     | VSIG4        | 0.13 | 0    | -3.7004397 |
| G9606_20572 | 100874261 | CCDC200      | 0.12 | 0    | -3.5849625 |
| G9606_1934  | 8900      | CCNA1        | 0.12 | 0    | -3.5849625 |
| G9606_11140 | 100529144 | CORO7-PAM16  | 0.12 | 0    | -3.5849625 |
| G9606_14223 | 54097     | FAM3B        | 0.12 | 0    | -3.5849625 |
| G9606_17299 | 3126      | HLA-DRB4     | 0.12 | 0    | -3.5849625 |
| G9606_28903 | 7044      | LEFTY2       | 0.12 | 0    | -3.5849625 |
| G9606_2196  | 149998    | LIPI         | 0.12 | 0    | -3.5849625 |
| G9606_31805 | 10744     | PTTG2        | 0.12 | 0    | -3.5849625 |
| G9606_10102 | 137902    | PXDNL        | 0.12 | 0    | -3.5849625 |
| G9606_25558 | 6036      | RNASE2       | 0.12 | 0    | -3.5849625 |
| G9606_5751  | 342933    | ZSCAN5B      | 0.12 | 0    | -3.5849625 |
| G9606_33007 | 30848     | CTAG2        | 0.11 | 0    | -3.4594316 |
| G9606_34859 | 349334    | FOXD4L4      | 0.11 | 0    | -3.4594316 |
| G9606_5665  | 9630      | GNA14        | 0.11 | 0    | -3.4594316 |
| G9606_10104 | 171558    | PTCRA        | 0.11 | 0    | -3.4594316 |
| G9606_4438  | 727940    | RHOXF2B      | 0.11 | 0    | -3.4594316 |
| G9606_20563 | 6101      | RP1          | 0.11 | 0.01 | -3.4594316 |
| G9606_30263 | 219539    | YPEL4        | 0.11 | 0    | -3.4594316 |
| G9606_31430 | 27299     | ADAMDEC1     | 0.1  | 0    | -3.3219281 |
| G9606_35892 | 267020    | ATP5MGL      | 0.1  | 0    | -3.3219281 |
| G9606_30720 | 525       | ATP6V1B1     | 0.1  | 0    | -3.3219281 |
| G9606_3936  | 80125     | CCDC33       | 0.1  | 0    | -3.3219281 |
| G9606_26256 | 1366      | CLDN7        | 0.1  | 0    | -3.3219281 |
| G9606_28087 | 1437      | CSF2         | 0.1  | 0    | -3.3219281 |
| G9606_26104 | 8214      | DGCR6        | 0.1  | 0    | -3.3219281 |
| G9606_539   | 84332     | DYDC2        | 0.1  | 0    | -3.3219281 |
| G9606_13815 | 730394    | GTF2H2C_2    | 0.1  | 0    | -3.3219281 |
| G9606_28514 | 100506164 | HSFX1        | 0.1  | 0    | -3.3219281 |
| G9606_28289 | 254050    | LRRC43       | 0.1  | 0    | -3.3219281 |

|             |           |              |      |      |            |
|-------------|-----------|--------------|------|------|------------|
| G9606_10244 | 135250    | RAET1E       | 0.1  | 0    | -3.3219281 |
| G9606_295   | 11262     | SP140        | 0.1  | 0    | -3.3219281 |
| G9606_6631  | 130733    | TMEM178A     | 0.1  | 0    | -3.3219281 |
| G9606_29820 | 339453    | TMEM240      | 0.1  | 0    | -3.3219281 |
| G9606_11174 | 7476      | WNT7A        | 0.29 | 0.03 | -3.2730185 |
| G9606_34182 | 147670    | SMIM17       | 0.19 | 0.02 | -3.2479275 |
| G9606_526   | 72        | ACTG2        | 0.09 | 0    | -3.169925  |
| G9606_22040 | 100130520 | CD300H       | 0.09 | 0    | -3.169925  |
| G9606_26180 | 387885    | CFAP73       | 0.09 | 0    | -3.169925  |
| G9606_5383  | 10170     | DHRS9        | 0.09 | 0    | -3.169925  |
| G9606_14928 | 2028      | ENPEP        | 0.09 | 0    | -3.169925  |
| G9606_12710 | 644145    | EXOC1L       | 0.09 | 0    | -3.169925  |
| G9606_9210  | 2352      | FOLR3        | 0.09 | 0    | -3.169925  |
| G9606_34793 | 26330     | GAPDHS       | 0.09 | 0    | -3.169925  |
| G9606_24952 | 254910    | LCE5A        | 0.09 | 0    | -3.169925  |
| G9606_11041 | 105370705 | LOC105370705 | 0.09 | 0    | -3.169925  |
| G9606_30143 | 4109      | MAGEA10      | 0.09 | 0    | -3.169925  |
| G9606_4521  | 4311      | MME          | 0.09 | 0.01 | -3.169925  |
| G9606_12817 | 128506    | OCSTAMP      | 0.09 | 0    | -3.169925  |
| G9606_9471  | 56127     | PCDHB9       | 0.09 | 0.01 | -3.169925  |
| G9606_7755  | 254122    | SNX32        | 0.09 | 0    | -3.169925  |
| G9606_29188 | 608       | TNFRSF17     | 0.09 | 0    | -3.169925  |
| G9606_7003  | 7293      | TNFRSF4      | 0.09 | 0    | -3.169925  |
| G9606_3757  | 51733     | UPB1         | 0.27 | 0.03 | -3.169925  |
| G9606_23502 | 51351     | ZNF117       | 0.09 | 0    | -3.169925  |
| G9606_29991 | 56265     | CPXM1        | 0.25 | 0.03 | -3.0588937 |
| G9606_23371 | 644974    | ALG1L2       | 0.08 | 0    | -3         |
| G9606_25804 | 145407    | ARMH4        | 0.08 | 0.01 | -3         |
| G9606_34566 | 147685    | C19orf18     | 0.08 | 0    | -3         |
| G9606_31387 | 124599    | CD300LB      | 0.08 | 0    | -3         |
| G9606_6564  | 146894    | CD300LG      | 0.08 | 0    | -3         |
| G9606_18145 | 1410      | CRYAB        | 0.08 | 0    | -3         |
| G9606_26393 | 100507170 | CT47A12      | 0.08 | 0.01 | -3         |
| G9606_22642 | 728082    | CT47A3       | 0.08 | 0.01 | -3         |
| G9606_10615 | 728072    | CT47A5       | 0.08 | 0.01 | -3         |
| G9606_28886 | 728042    | CT47A9       | 0.08 | 0.01 | -3         |
| G9606_9746  | 60401     | EDA2R        | 0.16 | 0.02 | -3         |
| G9606_10031 | 84553     | FAXC         | 0.08 | 0    | -3         |
| G9606_14158 | 2651      | GCNT2        | 0.08 | 0    | -3         |
| G9606_3258  | 389396    | GLYATL3      | 0.08 | 0    | -3         |
| G9606_33819 | 7923      | HSD17B8      | 0.08 | 0    | -3         |
| G9606_5736  | 10964     | IFI44L       | 0.08 | 0    | -3         |
| G9606_18193 | 101929692 | LOC101929692 | 0.08 | 0    | -3         |

|             |           |              |      |      |            |
|-------------|-----------|--------------|------|------|------------|
| G9606_17004 | 643802    | LOC643802    | 0.08 | 0    | -3         |
| G9606_32114 | 4113      | MAGEB2       | 0.08 | 0    | -3         |
| G9606_17569 | 25834     | MGAT4C       | 0.08 | 0    | -3         |
| G9606_26233 | 282770    | OR10AG1      | 0.08 | 0    | -3         |
| G9606_20387 | 26693     | OR2V1        | 0.08 | 0    | -3         |
| G9606_33032 | 170679    | PSORS1C1     | 0.08 | 0    | -3         |
| G9606_11272 | 374897    | SBSN         | 0.08 | 0    | -3         |
| G9606_1534  | 348378    | SHISAL2A     | 0.08 | 0    | -3         |
| G9606_8619  | 57413     | TMIGD3       | 0.08 | 0    | -3         |
| G9606_22202 | 26609     | VCX          | 0.08 | 0    | -3         |
| G9606_6496  | 440822    | PIWIL3       | 0.23 | 0.03 | -2.9385995 |
| G9606_29328 | 100130311 | C17orf107    | 0.07 | 0    | -2.8073549 |
| G9606_9659  | 942       | CD86         | 0.07 | 0    | -2.8073549 |
| G9606_25936 | 140947    | DCANP1       | 0.07 | 0    | -2.8073549 |
| G9606_35185 | 347516    | DGAT2L6      | 0.07 | 0    | -2.8073549 |
| G9606_6576  | 150350    | ENTHD1       | 0.07 | 0    | -2.8073549 |
| G9606_17836 | 131890    | GRK7         | 0.07 | 0.01 | -2.8073549 |
| G9606_17535 | 3274      | HRH2         | 0.07 | 0.01 | -2.8073549 |
| G9606_12901 | 146433    | IL34         | 0.07 | 0    | -2.8073549 |
| G9606_16962 | 284359    | IZUMO1       | 0.07 | 0    | -2.8073549 |
| G9606_34579 | 113730    | KLHDC7B      | 0.07 | 0    | -2.8073549 |
| G9606_3001  | 120071    | LARGE2       | 0.07 | 0    | -2.8073549 |
| G9606_452   | 105376525 | LOC105376525 | 0.07 | 0    | -2.8073549 |
| G9606_33980 | 105376722 | LOC105376722 | 0.07 | 0    | -2.8073549 |
| G9606_4618  | 646627    | LYPD8        | 0.07 | 0    | -2.8073549 |
| G9606_25229 | 4880      | NPPC         | 0.07 | 0    | -2.8073549 |
| G9606_29881 | 122748    | OR11H6       | 0.07 | 0    | -2.8073549 |
| G9606_14830 | 653781    | POTEJ        | 0.07 | 0    | -2.8073549 |
| G9606_4652  | 5590      | PRKCZ        | 0.07 | 0    | -2.8073549 |
| G9606_31568 | 5697      | PYY          | 0.07 | 0    | -2.8073549 |
| G9606_9204  | 57402     | S100A14      | 0.07 | 0    | -2.8073549 |
| G9606_24717 | 85477     | SCIN         | 0.07 | 0.01 | -2.8073549 |
| G9606_7045  | 6444      | SGCD         | 0.07 | 0    | -2.8073549 |
| G9606_15695 | 57586     | SYT13        | 0.07 | 0.01 | -2.8073549 |
| G9606_21597 | 259294    | TAS2R19      | 0.07 | 0    | -2.8073549 |
| G9606_32338 | 85012     | TCEAL3       | 0.07 | 0    | -2.8073549 |
| G9606_28559 | 7045      | TGFBI        | 0.07 | 0    | -2.8073549 |
| G9606_23227 | 391123    | VSIG8        | 0.07 | 0    | -2.8073549 |
| G9606_6776  | 126248    | WDR88        | 0.07 | 0    | -2.8073549 |
| G9606_14392 | 30832     | ZNF354C      | 0.07 | 0.01 | -2.8073549 |
| G9606_15076 | 107986762 | LOC107986762 | 0.19 | 0.03 | -2.662965  |
| G9606_9725  | 8785      | MATN4        | 0.19 | 0.03 | -2.662965  |
| G9606_11763 | 88        | ACTN2        | 0.06 | 0.01 | -2.5849625 |

|             |           |              |      |      |            |
|-------------|-----------|--------------|------|------|------------|
| G9606_30962 | 383       | ARG1         | 0.06 | 0    | -2.5849625 |
| G9606_5775  | 50649     | ARHGEF4      | 0.12 | 0.02 | -2.5849625 |
| G9606_34    | 116969    | ART5         | 0.06 | 0    | -2.5849625 |
| G9606_21374 | 79369     | B3GNT4       | 0.06 | 0    | -2.5849625 |
| G9606_11311 | 646457    | C19orf67     | 0.06 | 0    | -2.5849625 |
| G9606_3380  | 90557     | CCDC74A      | 0.06 | 0    | -2.5849625 |
| G9606_15350 | 1236      | CCR7         | 0.06 | 0    | -2.5849625 |
| G9606_21170 | 1443      | CSH2         | 0.06 | 0    | -2.5849625 |
| G9606_8392  | 66002     | CYP4F12      | 0.06 | 0    | -2.5849625 |
| G9606_14113 | 400830    | DEFB132      | 0.06 | 0    | -2.5849625 |
| G9606_21250 | 286380    | FOXD4L3      | 0.06 | 0    | -2.5849625 |
| G9606_16241 | 2525      | FUT3         | 0.06 | 0    | -2.5849625 |
| G9606_26361 | 439996    | IFIT1B       | 0.06 | 0    | -2.5849625 |
| G9606_9253  | 11185     | INMT         | 0.12 | 0.02 | -2.5849625 |
| G9606_5187  | 3742      | KCNA6        | 0.06 | 0    | -2.5849625 |
| G9606_2308  | 23415     | KCNH4        | 0.06 | 0    | -2.5849625 |
| G9606_21013 | 105371932 | LOC105371932 | 0.06 | 0    | -2.5849625 |
| G9606_5041  | 107986910 | LOC107986910 | 0.06 | 0    | -2.5849625 |
| G9606_11388 | 158809    | MAGEB6       | 0.06 | 0    | -2.5849625 |
| G9606_24160 | 100129480 | MKRN2OS      | 0.06 | 0    | -2.5849625 |
| G9606_17077 | 253827    | MSRB3        | 0.06 | 0    | -2.5849625 |
| G9606_1918  | 284958    | NT5DC4       | 0.06 | 0    | -2.5849625 |
| G9606_15712 | 4909      | NTF4         | 0.06 | 0    | -2.5849625 |
| G9606_13243 | 55200     | PLEKHG6      | 0.12 | 0.02 | -2.5849625 |
| G9606_12745 | 343035    | RD3          | 0.06 | 0    | -2.5849625 |
| G9606_8896  | 346673    | STRA8        | 0.06 | 0    | -2.5849625 |
| G9606_8478  | 56849     | TCEAL7       | 0.06 | 0    | -2.5849625 |
| G9606_28247 | 25823     | TPSG1        | 0.06 | 0    | -2.5849625 |
| G9606_411   | 341346    | SMCO2        | 0.41 | 0.07 | -2.5501971 |
| G9606_3693  | 3292      | HSD17B1      | 0.64 | 0.11 | -2.5405684 |
| G9606_24358 | 93145     | OLFM2        | 0.23 | 0.04 | -2.523562  |
| G9606_8050  | 631       | BFSP1        | 0.03 | 0.17 | 2.50250034 |
| G9606_12225 | 2793      | GNGT2        | 0.08 | 0.46 | 2.52356196 |
| G9606_32324 | 143689    | PIWIL4       | 0.04 | 0.23 | 2.52356196 |
| G9606_4201  | 84448     | ABLIM2       | 0    | 0.06 | 2.5849625  |
| G9606_26532 | 474       | ATOH1        | 0    | 0.06 | 2.5849625  |
| G9606_24365 | 50617     | ATP6V0A4     | 0    | 0.06 | 2.5849625  |
| G9606_33232 | 655       | BMP7         | 0    | 0.06 | 2.5849625  |
| G9606_19636 | 388759    | C1orf229     | 0    | 0.06 | 2.5849625  |
| G9606_7797  | 92291     | CAPN13       | 0    | 0.06 | 2.5849625  |
| G9606_25089 | 147372    | CCBE1        | 0.01 | 0.06 | 2.5849625  |
| G9606_1348  | 79846     | CFAP69       | 0    | 0.06 | 2.5849625  |
| G9606_11087 | 387837    | CLEC12B      | 0    | 0.06 | 2.5849625  |

|             |           |               |      |      |            |
|-------------|-----------|---------------|------|------|------------|
| G9606_23742 | 1409      | CRYAA         | 0    | 0.06 | 2.5849625  |
| G9606_21950 | 90288     | EFCAB12       | 0.01 | 0.06 | 2.5849625  |
| G9606_917   | 377841    | ENTPD8        | 0    | 0.06 | 2.5849625  |
| G9606_2122  | 388799    | FAM209B       | 0    | 0.06 | 2.5849625  |
| G9606_17532 | 100288801 | FRG2C         | 0    | 0.06 | 2.5849625  |
| G9606_13429 | 3250      | HPR           | 0    | 0.06 | 2.5849625  |
| G9606_33553 | 56832     | IFNK          | 0    | 0.06 | 2.5849625  |
| G9606_23731 | 3589      | IL11          | 0    | 0.06 | 2.5849625  |
| G9606_15201 | 27177     | IL36B         | 0    | 0.06 | 2.5849625  |
| G9606_9289  | 126306    | JSRP1         | 0    | 0.06 | 2.5849625  |
| G9606_21555 | 3766      | KCNJ10        | 0.01 | 0.06 | 2.5849625  |
| G9606_3578  | 346689    | KLRG2         | 0    | 0.06 | 2.5849625  |
| G9606_9472  | 54900     | LAX1          | 0    | 0.06 | 2.5849625  |
| G9606_981   | 107984153 | LOC107984153  | 0.01 | 0.06 | 2.5849625  |
| G9606_1753  | 22808     | MRAS          | 0    | 0.06 | 2.5849625  |
| G9606_28216 | 579       | NKX3-2        | 0    | 0.06 | 2.5849625  |
| G9606_9886  | 56923     | NMUR2         | 0    | 0.06 | 2.5849625  |
| G9606_4147  | 389643    | NUGGC         | 0    | 0.06 | 2.5849625  |
| G9606_28512 | 158046    | NXNL2         | 0    | 0.06 | 2.5849625  |
| G9606_14379 | 8612      | PLPP2         | 0    | 0.06 | 2.5849625  |
| G9606_22112 | 388199    | PRR25         | 0    | 0.06 | 2.5849625  |
| G9606_16260 | 83998     | REG4          | 0    | 0.06 | 2.5849625  |
| G9606_17699 | 5999      | RGS4          | 0    | 0.06 | 2.5849625  |
| G9606_18831 | 90203     | SNX21         | 0    | 0.06 | 2.5849625  |
| G9606_31325 | 6781      | STC1          | 0.01 | 0.06 | 2.5849625  |
| G9606_24284 | 221711    | SYCP2L        | 0    | 0.06 | 2.5849625  |
| G9606_12456 | 23546     | SYNGR4        | 0.08 | 0.48 | 2.5849625  |
| G9606_20453 | 100529257 | SYNJ2BP-COX16 | 0    | 0.06 | 2.5849625  |
| G9606_25502 | 7069      | THRSP         | 0    | 0.06 | 2.5849625  |
| G9606_16593 | 27283     | TINAG         | 0    | 0.06 | 2.5849625  |
| G9606_2061  | 494513    | PJVK          | 0.1  | 0.62 | 2.63226822 |
| G9606_29163 | 9080      | CLDN9         | 0.04 | 0.25 | 2.64385619 |
| G9606_3949  | 346653    | FAM71F2       | 0.03 | 0.19 | 2.66296501 |
| G9606_28180 | 107987233 | LOC107987233  | 0.07 | 0.45 | 2.68449817 |
| G9606_35494 | 440503    | PLIN5         | 0.02 | 0.13 | 2.70043972 |
| G9606_26400 | 59335     | PRDM12        | 0.02 | 0.13 | 2.70043972 |
| G9606_27866 | 128434    | VSTM2L        | 0.03 | 0.2  | 2.73696559 |
| G9606_27293 | 101060389 | TBC1D3D       | 0.04 | 0.27 | 2.7548875  |
| G9606_29857 | 137872    | ADHFE1        | 0    | 0.07 | 2.80735492 |
| G9606_4678  | 57085     | AGTRAP        | 0    | 0.07 | 2.80735492 |
| G9606_12450 | 8419      | BFSP2         | 0    | 0.07 | 2.80735492 |
| G9606_34987 | 110806296 | C1orf232      | 0    | 0.07 | 2.80735492 |
| G9606_26121 | 79935     | CCNP          | 0    | 0.07 | 2.80735492 |

|             |           |              |      |      |            |
|-------------|-----------|--------------|------|------|------------|
| G9606_1971  | 1438      | CSF2RA       | 0    | 0.07 | 2.80735492 |
| G9606_21841 | 145781    | GCOM1        | 0    | 0.07 | 2.80735492 |
| G9606_16990 | 3231      | HOXD1        | 0    | 0.07 | 2.80735492 |
| G9606_24974 | 3960      | LGALS4       | 0    | 0.07 | 2.80735492 |
| G9606_29324 | 107985734 | LOC107985734 | 0    | 0.07 | 2.80735492 |
| G9606_17760 | 112267951 | LOC112267951 | 0    | 0.07 | 2.80735492 |
| G9606_8753  | 225689    | MAPK15       | 0    | 0.07 | 2.80735492 |
| G9606_1083  | 346606    | MOGAT3       | 0    | 0.07 | 2.80735492 |
| G9606_25934 | 4607      | MYBPC3       | 0    | 0.07 | 2.80735492 |
| G9606_32717 | 392517    | NCBP2L       | 0    | 0.07 | 2.80735492 |
| G9606_12343 | 4939      | OAS2         | 0    | 0.07 | 2.80735492 |
| G9606_35544 | 119774    | OR52K2       | 0    | 0.07 | 2.80735492 |
| G9606_6028  | 5734      | PTGER4       | 0    | 0.07 | 2.80735492 |
| G9606_21086 | 282808    | RAB40AL      | 0    | 0.07 | 2.80735492 |
| G9606_8701  | 388015    | RTL1         | 0.01 | 0.07 | 2.80735492 |
| G9606_32350 | 100132963 | SMIM9        | 0    | 0.07 | 2.80735492 |
| G9606_19000 | 165904    | XIRP1        | 0    | 0.07 | 2.80735492 |
| G9606_10793 | 100129842 | ZNF737       | 0    | 0.07 | 2.80735492 |
| G9606_2737  | 162962    | ZNF836       | 0.01 | 0.07 | 2.80735492 |
| G9606_29174 | 81569     | ACTL8        | 0.04 | 0.29 | 2.857981   |
| G9606_6963  | 56917     | MEIS3        | 0.04 | 0.29 | 2.857981   |
| G9606_29675 | 353497    | POLN         | 0.05 | 0.39 | 2.96347412 |
| G9606_20778 | 122481    | AK7          | 0.04 | 0.32 | 3          |
| G9606_7470  | 146562    | C16orf71     | 0    | 0.08 | 3          |
| G9606_22996 | 919       | CD247        | 0    | 0.08 | 3          |
| G9606_6680  | 497190    | CLEC18B      | 0    | 0.08 | 3          |
| G9606_30449 | 125965    | COX6B2       | 0    | 0.08 | 3          |
| G9606_26383 | 339768    | ESPNL        | 0.01 | 0.08 | 3          |
| G9606_30227 | 84734     | FAM167B      | 0    | 0.08 | 3          |
| G9606_6895  | 92086     | GGTLC1       | 0    | 0.08 | 3          |
| G9606_14774 | 2844      | GPR21        | 0.01 | 0.08 | 3          |
| G9606_20007 | 285643    | KIF4B        | 0.01 | 0.08 | 3          |
| G9606_22592 | 105376678 | LOC105376678 | 0    | 0.08 | 3          |
| G9606_16445 | 29881     | NPC1L1       | 0.01 | 0.08 | 3          |
| G9606_23195 | 152816    | ODAPH        | 0    | 0.08 | 3          |
| G9606_14074 | 127608    | OR2AJ1       | 0    | 0.08 | 3          |
| G9606_35176 | 391192    | OR2L3        | 0    | 0.08 | 3          |
| G9606_14246 | 79317     | OR4K5        | 0    | 0.08 | 3          |
| G9606_19324 | 64714     | PDIA2        | 0    | 0.08 | 3          |
| G9606_30903 | 5453      | POU3F1       | 0    | 0.08 | 3          |
| G9606_30199 | 145226    | RDH12        | 0.03 | 0.24 | 3          |
| G9606_9344  | 7782      | SLC30A4      | 0.01 | 0.08 | 3          |
| G9606_27134 | 399668    | SMIM10L2A    | 0.01 | 0.08 | 3          |

|             |           |              |      |      |            |
|-------------|-----------|--------------|------|------|------------|
| G9606_8565  | 9901      | SRGAP3       | 0    | 0.08 | 3          |
| G9606_18156 | 259292    | TAS2R46      | 0    | 0.08 | 3          |
| G9606_25037 | 646799    | ZAR1L        | 0    | 0.08 | 3          |
| G9606_33168 | 7712      | ZNF157       | 0.02 | 0.17 | 3.08746284 |
| G9606_2788  | 1316      | KLF6         | 0.79 | 7    | 3.14743036 |
| G9606_35936 | 566       | AZU1         | 0    | 0.09 | 3.169925   |
| G9606_33560 | 100131378 | C11orf91     | 0    | 0.09 | 3.169925   |
| G9606_30401 | 1562      | CYP2C18      | 0    | 0.09 | 3.169925   |
| G9606_30882 | 2634      | GBP2         | 0.01 | 0.09 | 3.169925   |
| G9606_1954  | 3002      | GZMB         | 0    | 0.09 | 3.169925   |
| G9606_27798 | 474381    | H2AB2        | 0    | 0.09 | 3.169925   |
| G9606_31841 | 83740     | H2AB3        | 0    | 0.09 | 3.169925   |
| G9606_20180 | 3805      | KIR2DL4      | 0    | 0.09 | 3.169925   |
| G9606_5531  | 136259    | KLF14        | 0    | 0.09 | 3.169925   |
| G9606_22278 | 200634    | KRTCAP3      | 0    | 0.09 | 3.169925   |
| G9606_8277  | 101929400 | LOC101929400 | 0    | 0.09 | 3.169925   |
| G9606_26272 | 102724965 | LOC102724965 | 0    | 0.09 | 3.169925   |
| G9606_21413 | 107984043 | LOC107984043 | 0    | 0.09 | 3.169925   |
| G9606_4995  | 130752    | MDH1B        | 0    | 0.09 | 3.169925   |
| G9606_16004 | 5346      | PLIN1        | 0    | 0.09 | 3.169925   |
| G9606_18983 | 154197    | PNLDC1       | 0    | 0.09 | 3.169925   |
| G9606_15384 | 5626      | PROP1        | 0    | 0.09 | 3.169925   |
| G9606_4720  | 729974    | RFPL4AL1     | 0    | 0.09 | 3.169925   |
| G9606_6092  | 51151     | SLC45A2      | 0    | 0.09 | 3.169925   |
| G9606_32461 | 285051    | STPG4        | 0    | 0.09 | 3.169925   |
| G9606_11287 | 199964    | TMEM61       | 0    | 0.09 | 3.169925   |
| G9606_21888 | 399939    | TRIM49D1     | 0    | 0.09 | 3.169925   |
| G9606_21639 | 164153    | UBL4B        | 0    | 0.09 | 3.169925   |
| G9606_31716 | 978       | CDA          | 0    | 0.1  | 3.32192809 |
| G9606_29108 | 1357      | CPA1         | 0    | 0.1  | 3.32192809 |
| G9606_35344 | 1815      | DRD4         | 0    | 0.1  | 3.32192809 |
| G9606_14554 | 51233     | DRICH1       | 0    | 0.1  | 3.32192809 |
| G9606_12475 | 3266      | ERAS         | 0    | 0.1  | 3.32192809 |
| G9606_30884 | 653404    | FOXD4L6      | 0    | 0.1  | 3.32192809 |
| G9606_9660  | 100130086 | HSFX2        | 0    | 0.1  | 3.32192809 |
| G9606_3296  | 113220    | KIF12        | 0    | 0.1  | 3.32192809 |
| G9606_29126 | 4878      | NPPA         | 0    | 0.1  | 3.32192809 |
| G9606_26152 | 138429    | PIP5KL1      | 0.02 | 0.2  | 3.32192809 |
| G9606_19142 | 124912    | SPACA3       | 0    | 0.1  | 3.32192809 |
| G9606_565   | 201305    | SPNS3        | 0    | 0.1  | 3.32192809 |
| G9606_14795 | 727837    | SSX2B        | 0    | 0.1  | 3.32192809 |
| G9606_8195  | 120379    | PIH1D2       | 0.07 | 0.72 | 3.36257008 |
| G9606_32879 | 1215      | CMA1         | 0    | 0.11 | 3.45943162 |



|             |           |              |      |      |            |
|-------------|-----------|--------------|------|------|------------|
| G9606_27849 | 8506      | CNTNAP1      | 0.01 | 0.11 | 3.45943162 |
| G9606_182   | 79852     | EPHX3        | 0    | 0.11 | 3.45943162 |
| G9606_30586 | 26290     | GALNT8       | 0    | 0.11 | 3.45943162 |
| G9606_7129  | 3821      | KLRC1        | 0    | 0.11 | 3.45943162 |
| G9606_16199 | 102724474 | LOC102724474 | 0    | 0.11 | 3.45943162 |
| G9606_34862 | 10894     | LYVE1        | 0.02 | 0.22 | 3.45943162 |
| G9606_21586 | 57134     | MAN1C1       | 0    | 0.11 | 3.45943162 |
| G9606_35072 | 116729    | PPP1R27      | 0    | 0.11 | 3.45943162 |
| G9606_24047 | 2837      | UTS2R        | 0    | 0.11 | 3.45943162 |
| G9606_28700 | 6347      | CCL2         | 0    | 0.12 | 3.5849625  |
| G9606_3320  | 55679     | LIMS2        | 0    | 0.12 | 3.5849625  |
| G9606_27092 | 145873    | MESP2        | 0    | 0.12 | 3.5849625  |
| G9606_14444 | 4256      | MGP          | 0    | 0.12 | 3.5849625  |
| G9606_9894  | 6588      | SLN          | 0    | 0.12 | 3.5849625  |
| G9606_1485  | 83890     | SPATA9       | 0    | 0.12 | 3.5849625  |
| G9606_11604 | 729767    | CEACAM18     | 0    | 0.13 | 3.70043972 |
| G9606_21843 | 1081      | CGA          | 0    | 0.13 | 3.70043972 |
| G9606_17040 | 10669     | CGREF1       | 0    | 0.13 | 3.70043972 |
| G9606_16723 | 128821    | CST9L        | 0    | 0.13 | 3.70043972 |
| G9606_32270 | 2695      | GIP          | 0    | 0.13 | 3.70043972 |
| G9606_11232 | 5947      | RBP1         | 0    | 0.13 | 3.70043972 |
| G9606_11354 | 440184    | CCDC196      | 0    | 0.14 | 3.80735492 |
| G9606_17479 | 157807    | CLVS1        | 0    | 0.14 | 3.80735492 |
| G9606_20548 | 493861    | EID3         | 0    | 0.14 | 3.80735492 |
| G9606_639   | 728441    | GGT2         | 0    | 0.14 | 3.80735492 |
| G9606_35592 | 245802    | MS4A6E       | 0    | 0.14 | 3.80735492 |
| G9606_29451 | 64648     | SPANXD       | 0    | 0.14 | 3.80735492 |
| G9606_32720 | 55350     | VNN3         | 0    | 0.14 | 3.80735492 |
| G9606_17147 | 343       | AQP8         | 0    | 0.15 | 3.9068906  |
| G9606_22612 | 929       | CD14         | 0    | 0.15 | 3.9068906  |
| G9606_14346 | 641700    | ECSCR        | 0    | 0.15 | 3.9068906  |
| G9606_9625  | 10361     | NPM2         | 0    | 0.15 | 3.9068906  |
| G9606_36037 | 5222      | PGA5         | 0    | 0.15 | 3.9068906  |
| G9606_22809 | 643596    | RNF224       | 0    | 0.15 | 3.9068906  |
| G9606_26045 | 143941    | TTC36        | 0    | 0.15 | 3.9068906  |
| G9606_3106  | 165545    | DQX1         | 0.03 | 0.47 | 3.96962635 |
| G9606_34594 | 56311     | ANKRD7       | 0    | 0.16 | 4          |
| G9606_24513 | 3112      | HLA-DOB      | 0    | 0.16 | 4          |
| G9606_14434 | 81470     | OR2G2        | 0    | 0.16 | 4          |
| G9606_35994 | 2810      | SFN          | 0    | 0.16 | 4          |
| G9606_31241 | 81469     | OR2G3        | 0    | 0.17 | 4.08746284 |
| G9606_7877  | 102724127 | TP53TG3F     | 0    | 0.17 | 4.08746284 |
| G9606_10018 | 255119    | CFAP299      | 0    | 0.18 | 4.169925   |

|             |           |               |      |      |            |
|-------------|-----------|---------------|------|------|------------|
| G9606_28791 | 168537    | GIMAP7        | 0    | 0.18 | 4.169925   |
| G9606_10733 | 2939      | GSTA2         | 0    | 0.18 | 4.169925   |
| G9606_29808 | 100310846 | ANKRD61       | 0    | 0.19 | 4.24792751 |
| G9606_12603 | 126393    | HSPB6         | 0    | 0.19 | 4.24792751 |
| G9606_15614 | 254773    | LYG2          | 0    | 0.19 | 4.24792751 |
| G9606_19558 | 100532736 | MICOS10-NBL1  | 0    | 0.19 | 4.24792751 |
| G9606_19102 | 29895     | MYLPF         | 0    | 0.19 | 4.24792751 |
| G9606_12896 | 27232     | GNMT          | 0    | 0.2  | 4.32192809 |
| G9606_11115 | 402381    | SOHLH1        | 0    | 0.2  | 4.32192809 |
| G9606_20503 | 441168    | CALHM6        | 0    | 0.21 | 4.39231742 |
| G9606_15388 | 121355    | GTSF1         | 0    | 0.21 | 4.39231742 |
| G9606_13872 | 145376    | PPP1R36       | 0    | 0.21 | 4.39231742 |
| G9606_18943 | 54210     | TREM1         | 0    | 0.21 | 4.39231742 |
| G9606_12808 | 728734    | NPIP8         | 0.05 | 1.06 | 4.40599236 |
| G9606_8236  | 57818     | G6PC2         | 0    | 0.22 | 4.45943162 |
| G9606_16420 | 100528032 | KLRC4-KLRK1   | 0    | 0.22 | 4.45943162 |
| G9606_9177  | 105378949 | LOC105378949  | 0    | 0.22 | 4.45943162 |
| G9606_26189 | 100652777 | LOC100652777  | 0    | 0.23 | 4.52356196 |
| G9606_3822  | 27122     | DKK3          | 0    | 0.24 | 4.5849625  |
| G9606_33982 | 149643    | SPATA45       | 0    | 0.24 | 4.5849625  |
| G9606_33420 | 26212     | OR2B6         | 0    | 0.25 | 4.64385619 |
| G9606_11391 | 283927    | NUDT7         | 0    | 0.27 | 4.7548875  |
| G9606_20194 | 283106    | CSNK2A3       | 0    | 0.29 | 4.857981   |
| G9606_18624 | 644186    | SYCE3         | 0    | 0.3  | 4.9068906  |
| G9606_34271 | 1469      | CST1          | 0    | 0.34 | 5.08746284 |
| G9606_16554 | 51027     | BOLA1         | 0    | 0.36 | 5.169925   |
| G9606_2548  | 6447      | SCG5          | 0    | 0.38 | 5.24792751 |
| G9606_20018 | 342977    | NANOS3        | 0    | 0.4  | 5.32192809 |
| G9606_19726 | 335       | APOA1         | 0    | 0.44 | 5.45943162 |
| G9606_19962 | 5149      | PDE6H         | 0    | 0.48 | 5.5849625  |
| G9606_13338 | 101927345 | LOC101927345  | 0    | 0.5  | 5.64385619 |
| G9606_31661 | 5730      | PTGDS         | 0    | 0.52 | 5.70043972 |
| G9606_27855 | 106865373 | GET1-SH3BGR   | 0    | 0.57 | 5.83289001 |
| G9606_35106 | 729428    | GAGE12B       | 0    | 0.58 | 5.857981   |
| G9606_21500 | 102724219 | LOC102724219  | 0    | 0.59 | 5.88264305 |
| G9606_17216 | 100527949 | GIMAP1-GIMAP5 | 0    | 0.63 | 5.97727992 |
| G9606_32396 | 10365     | KLF2          | 0.13 | 9.02 | 6.11654391 |
| G9606_29192 | 8368      | H4C13         | 0    | 0.94 | 6.55458885 |
| G9606_24200 | 100137049 | PLA2G4B       | 0    | 1.48 | 7.20945337 |

---
