# Supplementary material for: Lovastatin inhibits erythroleukemia progression through KLF2-mediated suppression of MAPK/ERK signaling
Source: Springer Nature journal article supplement (doi:10.1186/s12885-023-10742-4), 2023-04-04
Supplement: MOESM3 [file 25207586]

## Original/unprocessed western blot images

Fig. 1d

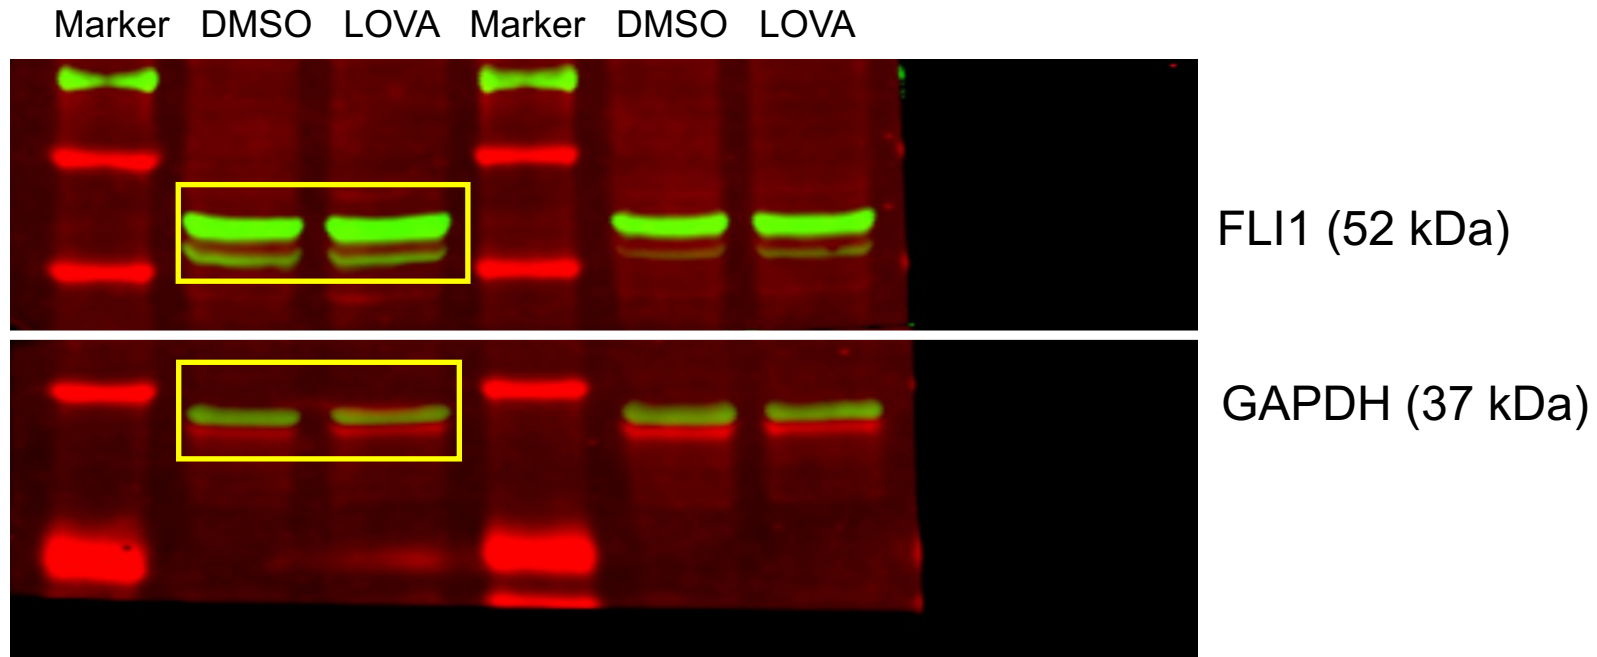

**Supplementary Figure 5.** The full-length blots of FLI1 and GAPDH. The same membranes were cut or/and hybridized with different antibodies according to the molecular weights.

**Fig. 4b**

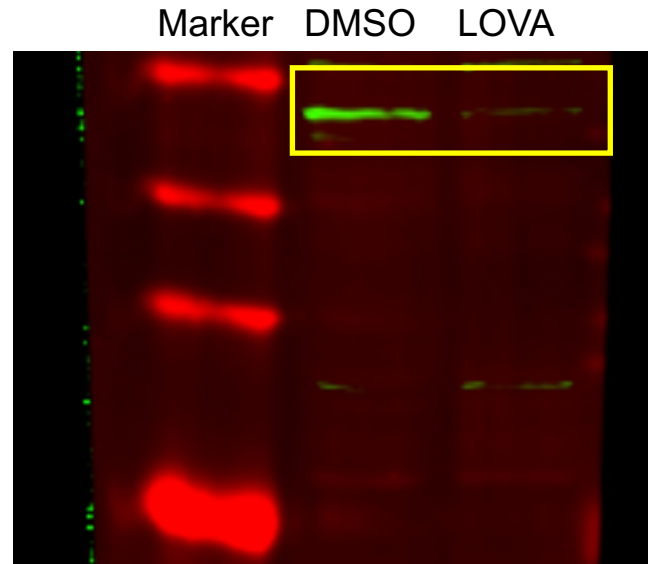

FAM83A (47 kDa)

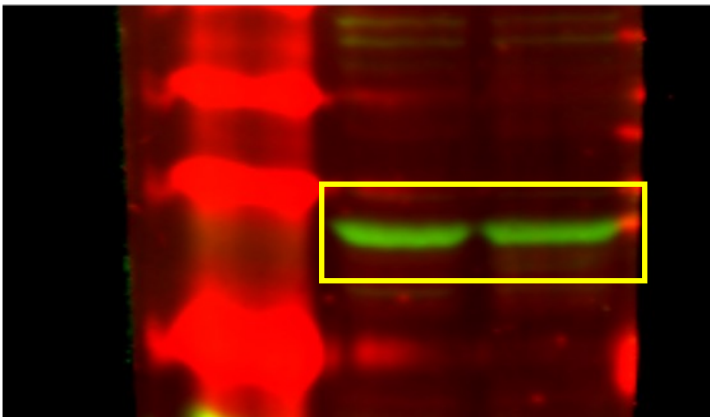

GAPDH (37 kDa)

**Fig. 4c**

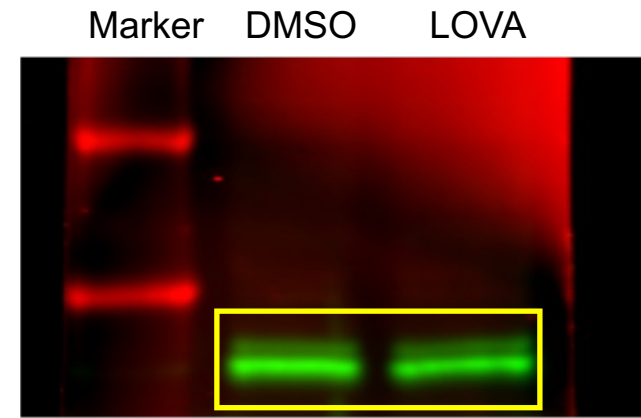

ERK (42 kDa)

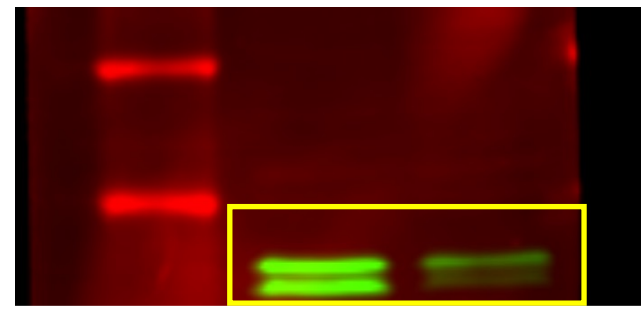

P-ERK (42 kDa)

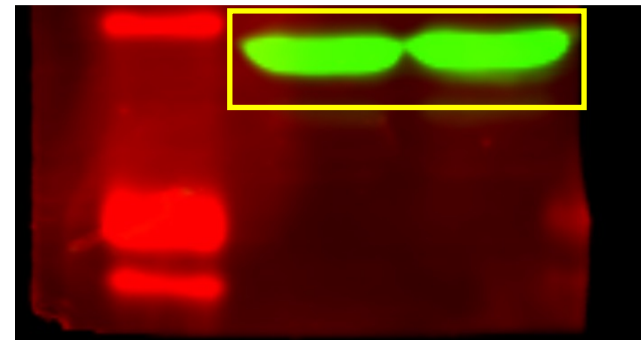

GAPDH (37 kDa)

**Supplementary Fig. 6.** The full-length blots of FAM83A ERK, DDIT4, P-ERK and GAPDH. The same membranes were cut or/and hybridized with different antibodies according to the molecular weights.

**Fig. 4f**

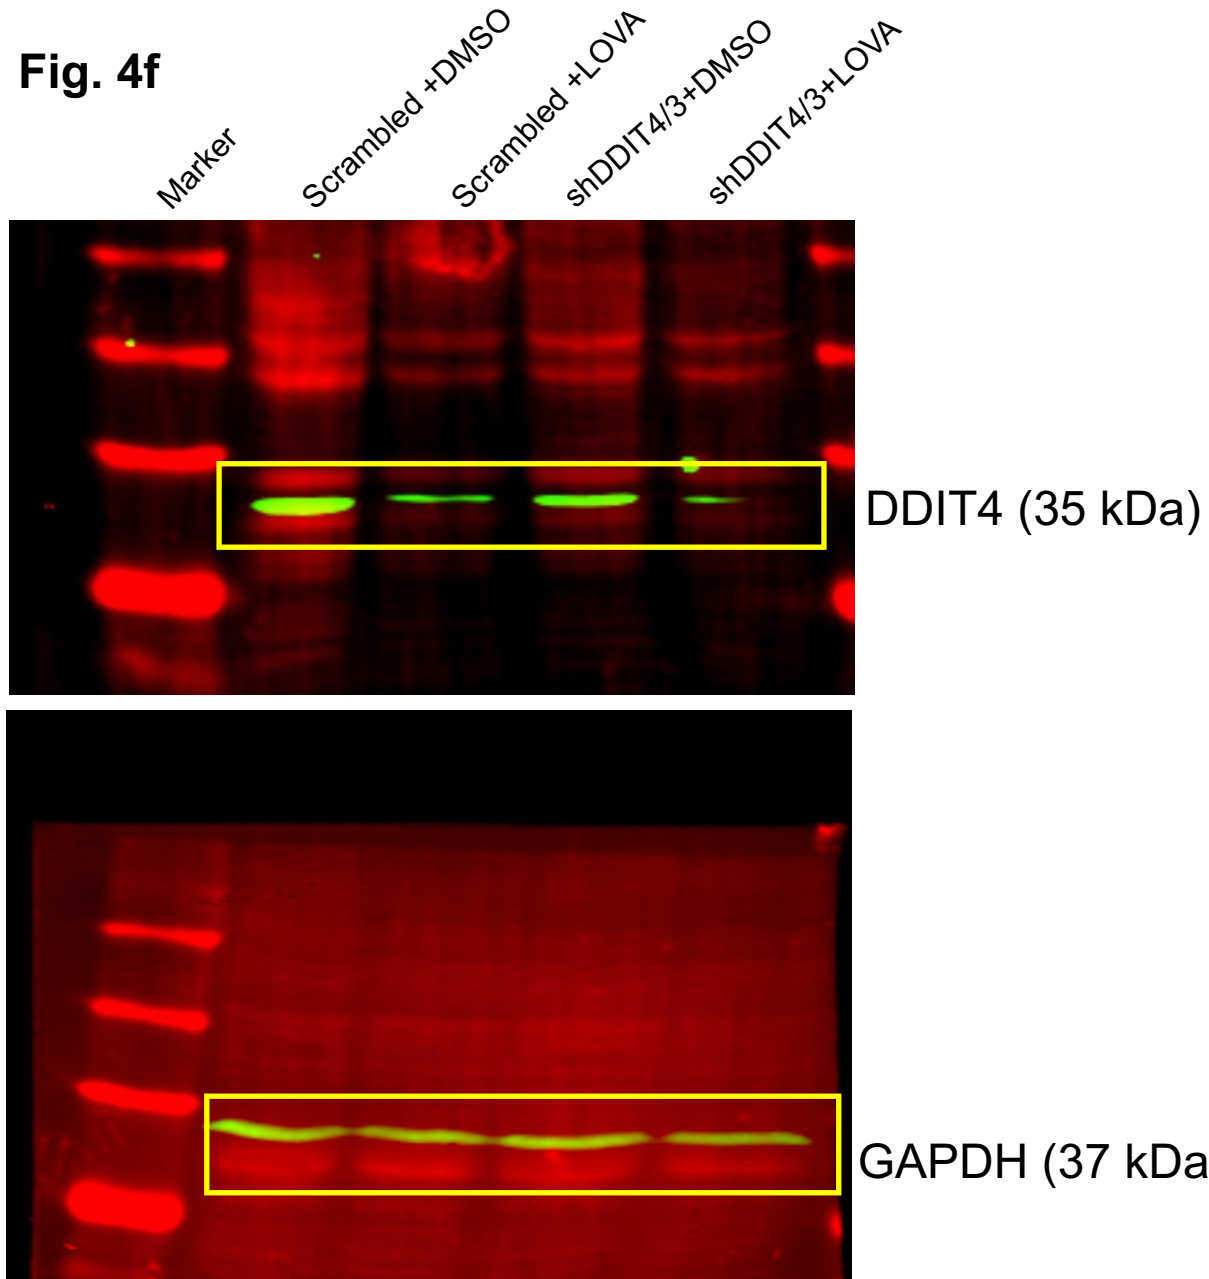

**Fig. 4h**

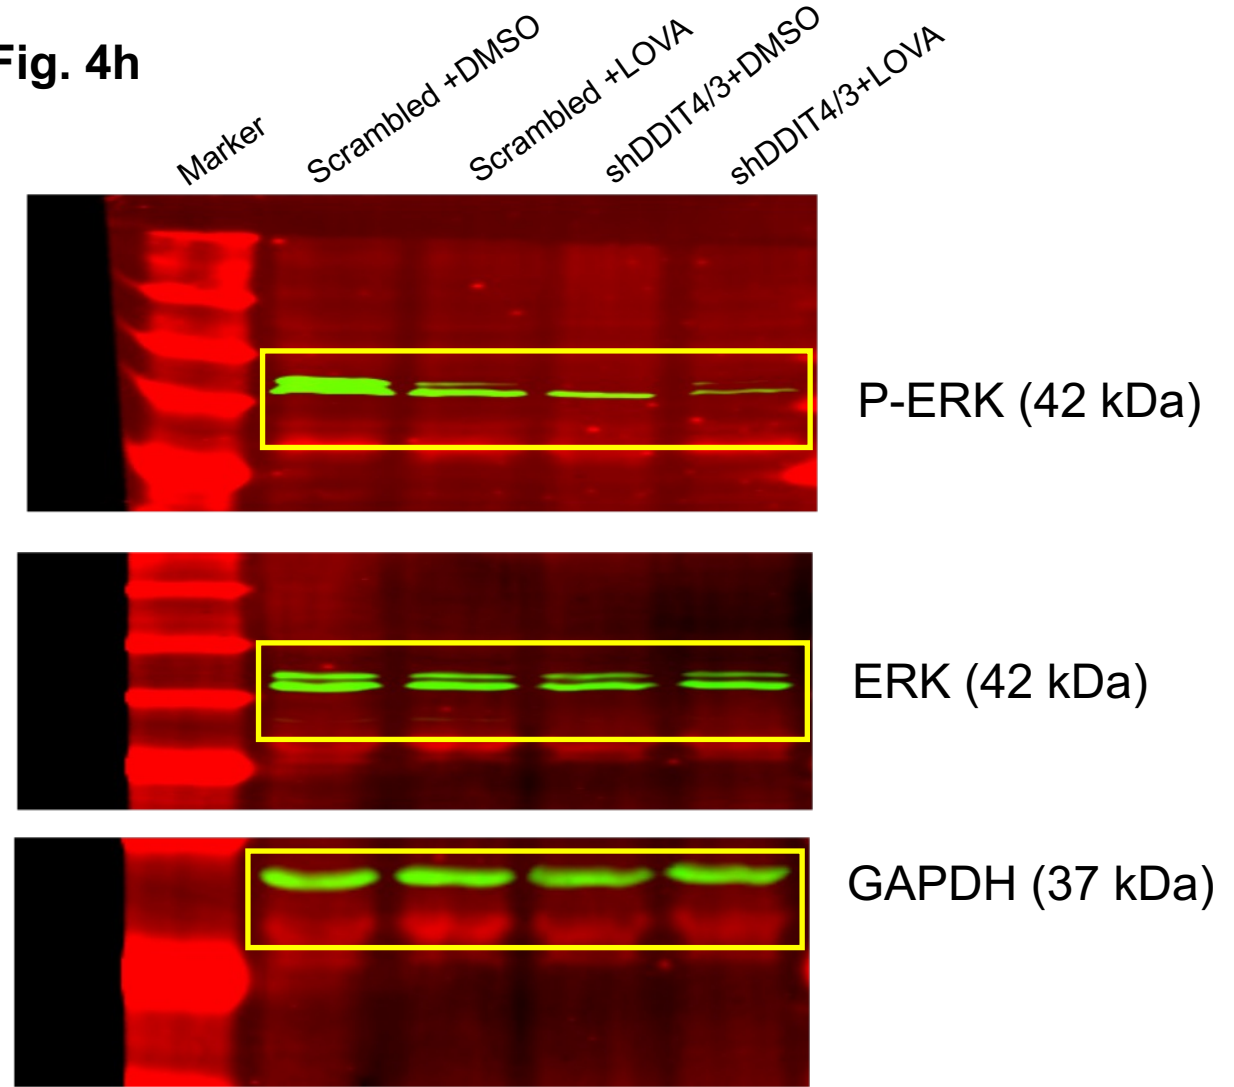

**Supplementary Fig. 6.** The full-length blots of FAM83A ERK, DDIT4, P-ERK and GAPDH. The same membranes were cut or/and hybridized with different antibodies according to the molecular weights.

**Fig. 5b**

Marker  
DMSO  
LOVA

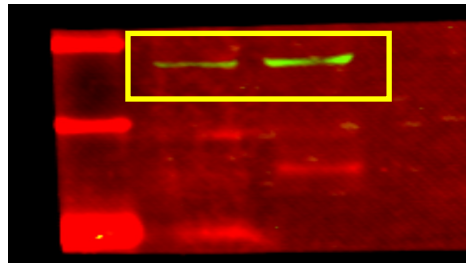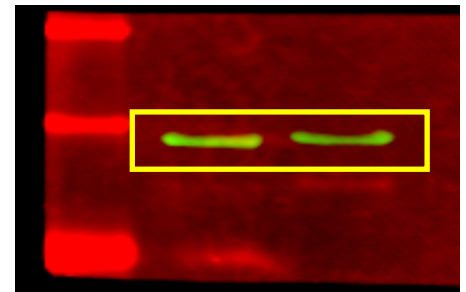

**Fig. 5d**

Marker  
Scrambled+DMSO  
Scrambled+Lova  
shKLF2/2+DMSO  
shKLF2/2+Lova  
shKLF2/3+DMSO  
shKLF2/3+Lova

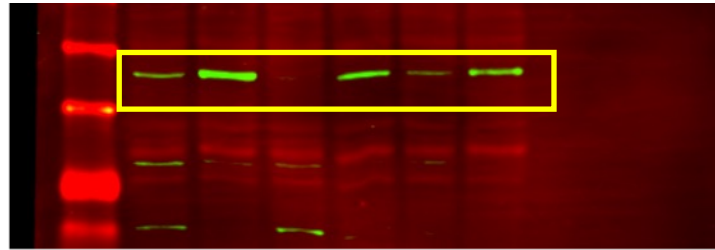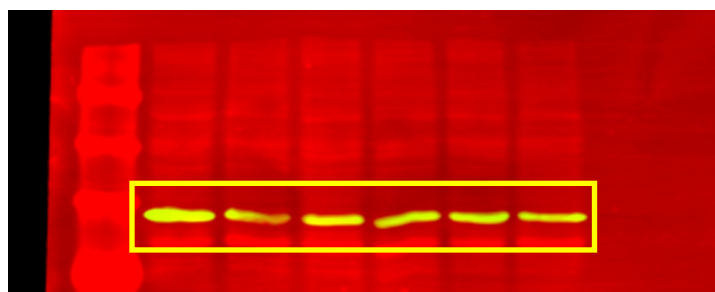

KLF2 (37 kDa)

GAPDH (37 kDa)

**Fig. 5h**

Marker  
Scrambled+DMSO  
Scrambled+Lova  
shKLF2/2+DMSO  
shKLF2/2+Lova

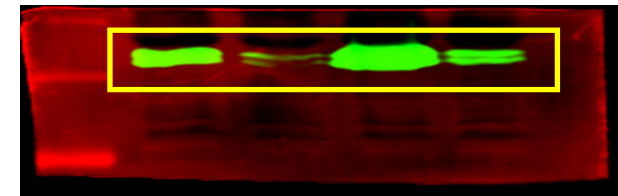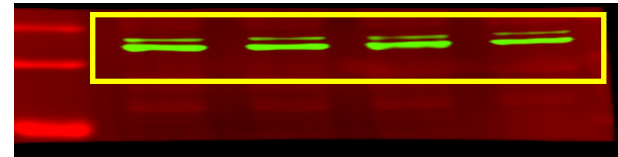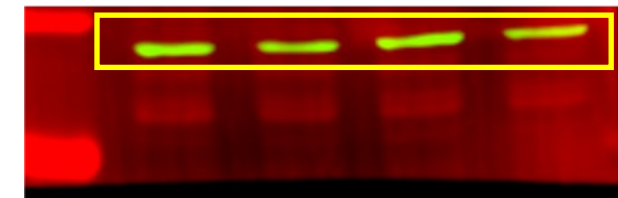

P-ERK (42 kDa)

ERK (42 kDa)

GAPDH (37 kDa)

**Supplementary Fig. 7.** The full-length blots of KLF2, ERK, P-ERK and GAPDH. The same membranes were cut or/and hybridized with different antibodies according to the molecular weights.

## Supplementary Fig. 1a

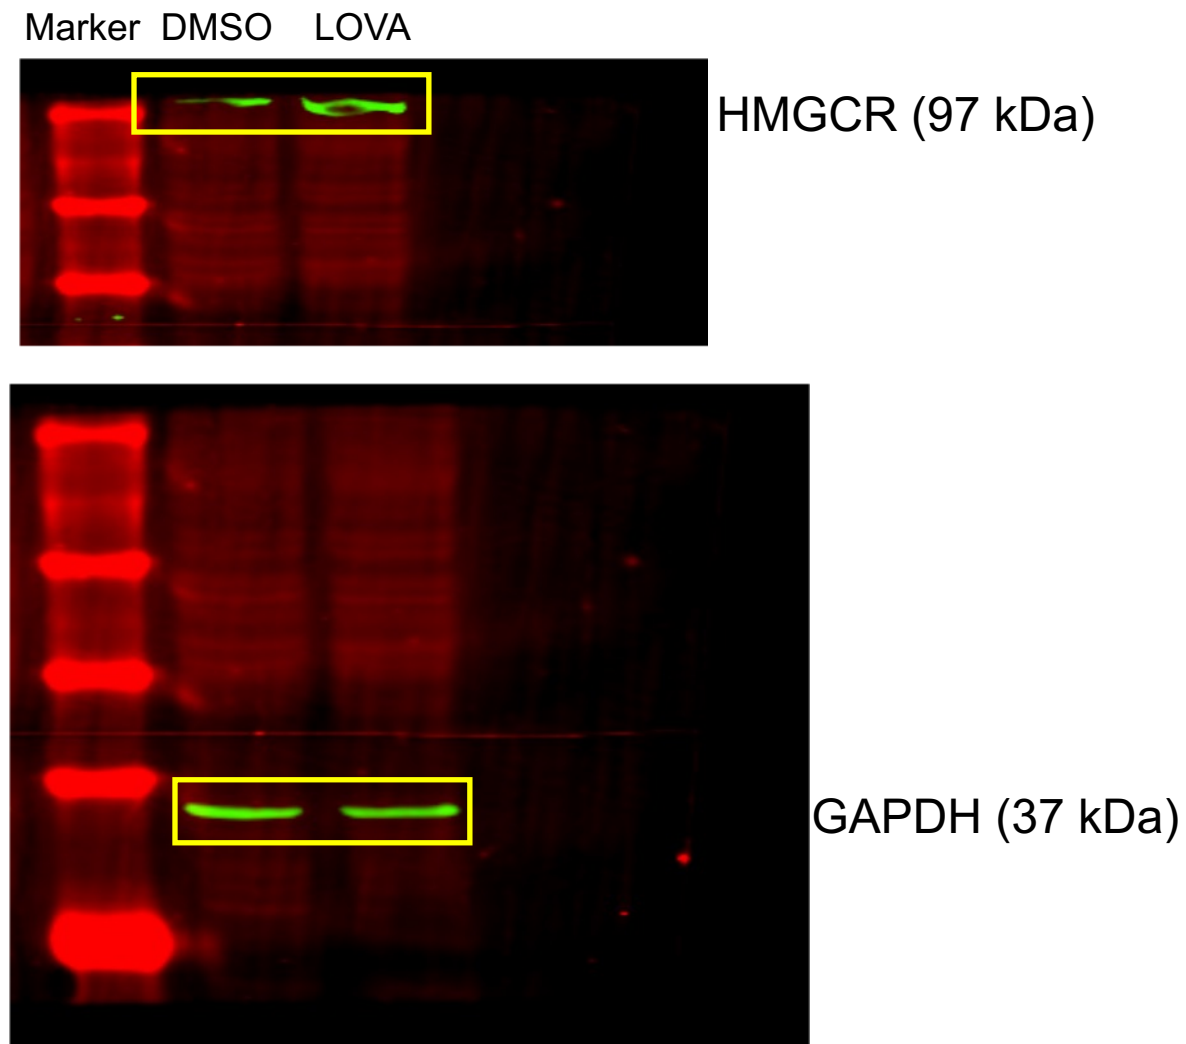

## Supplementary Fig. 1b

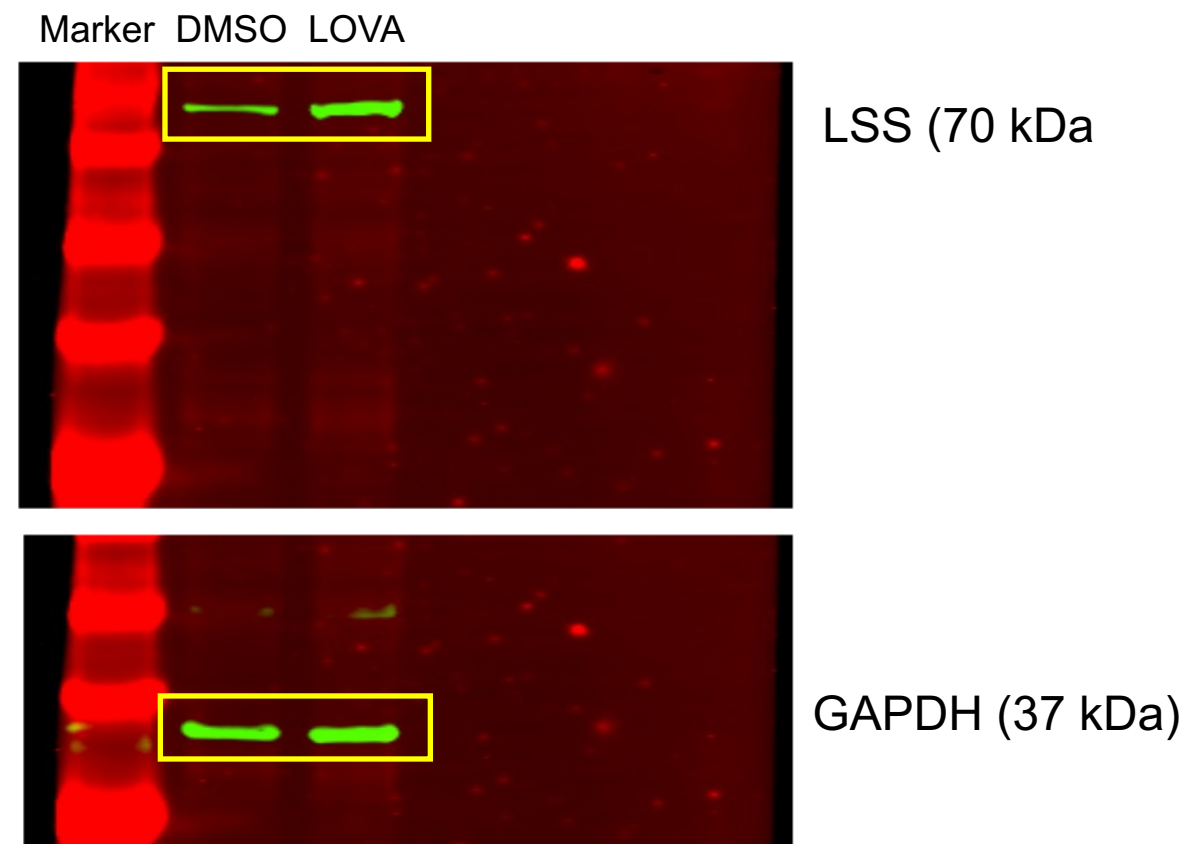

**Supplementary Fig. 8.** The full-length blots of HMGCR, LSS, and GAPDH. The same membranes were cut or/and hybridized with different antibodies according to the molecular weights.

### Supplementary Fig. 3

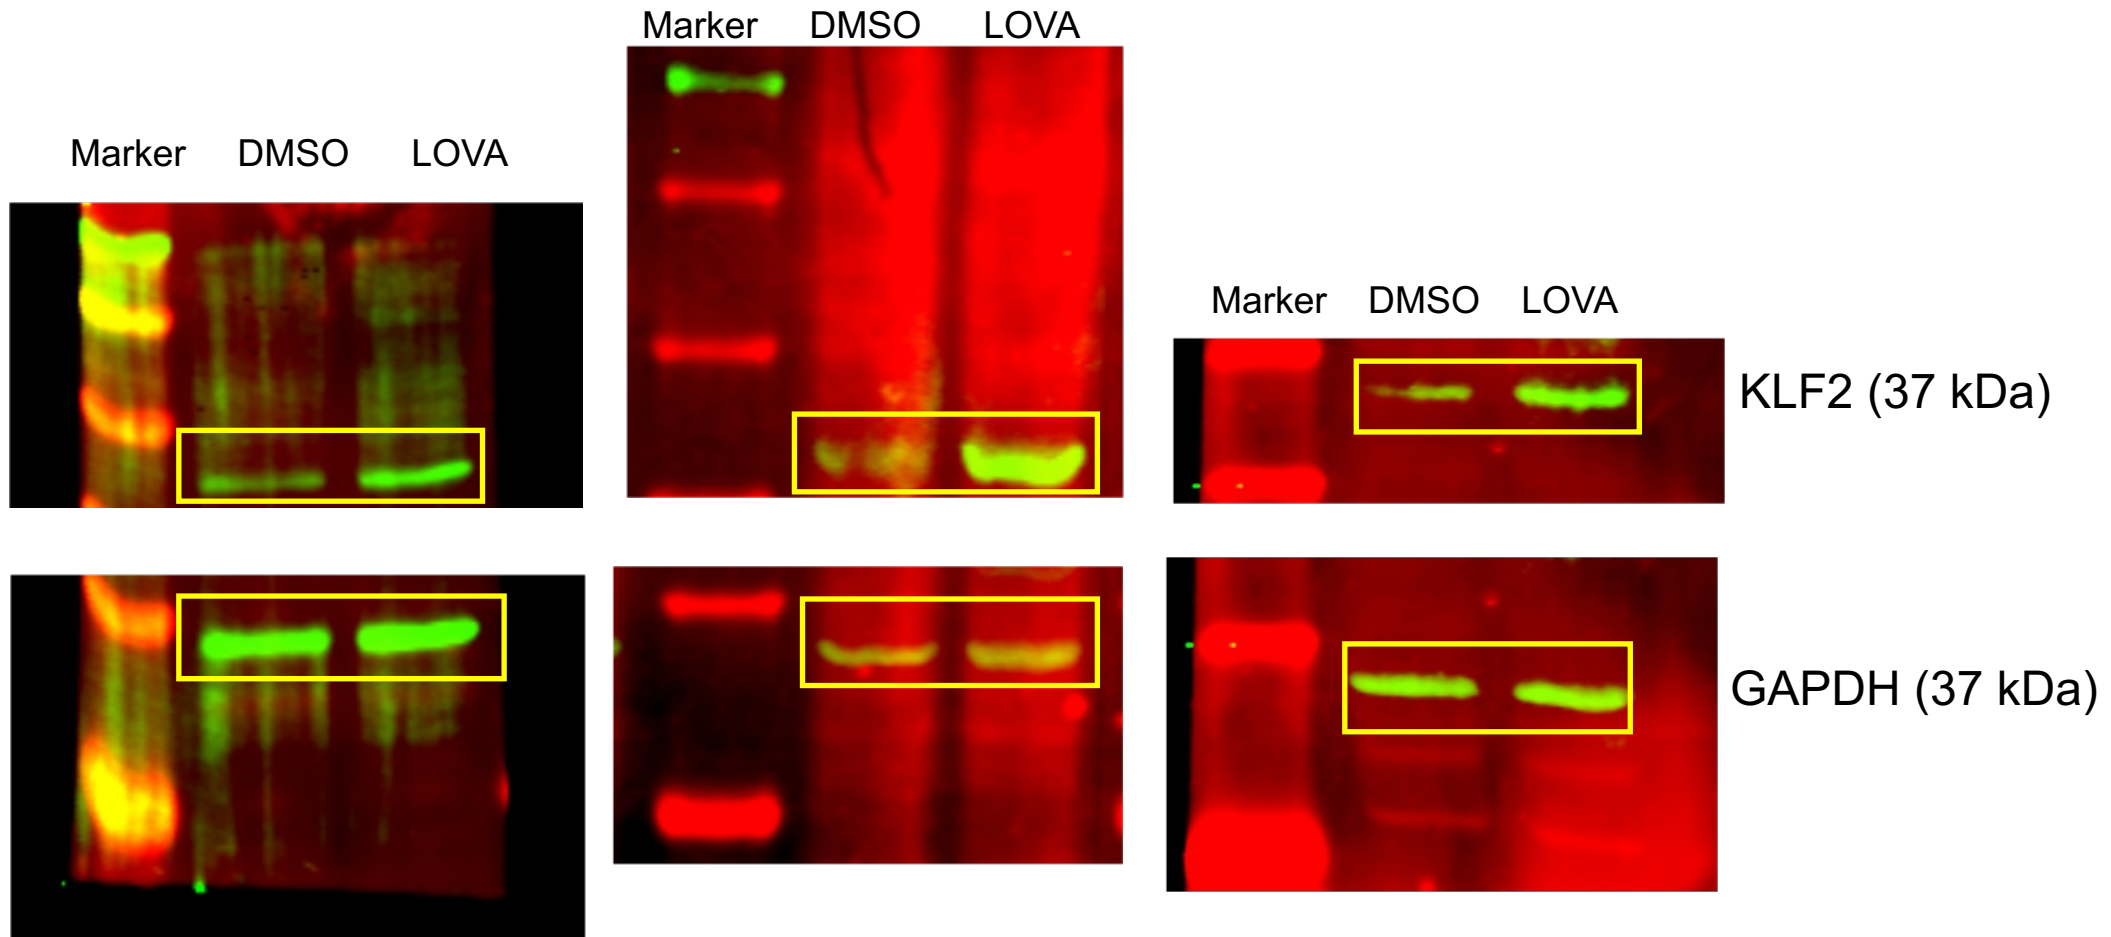

**Supplementary Fig. 9.** The full-length blots of KLF2 and GAPDH. The same membranes were cut or/and hybridized with different antibodies according to the molecular weights.
